# Ultra Fast and Highly Realistic Numerical Modelling of the Surface EMG

Kostiantyn Maksymenko<sup>1</sup>, Samuel Deslauriers-Gauthier<sup>1, 2</sup>, and  
Dario Farina<sup>3</sup>

<sup>1</sup>Neurodec, Sophia Antipolis, France

<sup>2</sup>Inria Sophia Antipolis - Méditerranée, Université Côte D'Azur,  
Nice, France

<sup>3</sup>Department of Bioengineering, Imperial College London, London,  
UK

June 7, 2021

## Abstract

Modelling the biophysics underlying the generation and recording of electromyographic (EMG) signals has had a fundamental role in our understanding of muscle electrophysiology as well as in the validation of algorithms for information extraction from the EMG. Current EMG models differ for the complexity of the description of the volume conductor. Analytical solutions are computationally efficient for a small number of fibers but limited to simplified geometries. Numerical solutions are based on accurate anatomical descriptions but require long computational time and are therefore impractical for applications requiring a large number of simulations across a broad variety of conditions. Here, we propose a computationally efficient and realistic EMG model. The volume conductor is described from magnetic resonance images (MRI) or tissue surfaces by discretization in a tetrahedral mesh. The numerical solution of the forward model is optimized by reducing the main calculations to the solutions in a minimal number of basis points, from which the general solution can be obtained. This approach allows the lowest computational time than any current EMG models and also provides a scalable solution. New solutions for the same volume conductor can indeed be obtained without re-computing the volume conductor transformation. This property provides almost real-time simulations, without any constraints on the complexity of the volume conductor or of the transmembrane current source. Because of the high computational efficiency, the proposed model can be used as a basis for the solution of the inverse model or as a means to simulate a large number of data for artificial intelligence (AI) based EMG processing.

## 36 1 Introduction

37 Biophysical modelling of the generation and recording of muscle electrical signals  
38 (electromyography, EMG) has been extensively described (for review, see [1]).  
39 The solution of the forward problem in EMG generation is based on Maxwell's  
40 equations. However, as for other biosignals, because of the relatively low fre-  
41 quencies of the sources, a quasi-static assumption can be applied [2, 3]. This as-  
42 sumption simplifies the problem to the solution of the Poisson equation [2, 4, 5],  
43 with Neumann boundary conditions. With this simplification, the forward prob-  
44 lem can be analytically solved for specific geometries of the volume conductor,  
45 such as for the planar (e.g., [6]) or cylindrical ([7, 8]) shapes. Accordingly,  
46 analytical EMG models based on these geometries have been developed and  
47 extensively used (e.g., [9, 10, 11, 12, 13]).

48 The simple geometries treated with analytical solutions provide simulations  
49 which reflect the broad characteristics of EMG signals but cannot be used to  
50 interpret specific experimental conditions or to reverse the model for source  
51 identification. More realistic models of EMG generation are based on numer-  
52 ical solutions of the Poisson equation with generic volume conductor shapes  
53 (e.g., [14, 15]). Nonetheless, numerical EMG models have had so far limited ap-  
54 plicability because of the high computational time they require. Currently, there  
55 are no computationally efficient models of EMG generation with highly accurate  
56 description of the volume conductor. Therefore, the use of EMG models is not  
57 extensive. They are mainly applied to identify the generic associations between  
58 physiological mechanisms and features of the EMG signal (e.g., [10, 12]).

59 Because of the recent breakthroughs in artificial intelligence in association with  
60 decoding surface EMG signals into individual motor unit activities [16, 17], the  
61 availability of highly accurate EMG models has become of renewed importance.  
62 Highly accurate models with computational speed comparable to simplified an-  
63 alytical models would allow addressing the decoding problem for EMG by pro-  
64 viding arbitrarily large sets of data for training deep neural networks. Moreover,  
65 these models would find potential applications in developing inverse solutions  
66 for source identification [18]. The combination of almost real-time precise mod-  
67 elling and artificial intelligence would open new perspectives in the use of EMG  
68 for building neuromuscular human-machine interfaces, for diagnostics, and for  
69 neuroscientific investigations.

70 Here we describe an EMG model based on the numerical solution of the volume  
71 conductor equations. The forward solutions are computed for selected point  
72 current sources (basis sources) and the response of the system to any current  
73 source inside the volume conductor is calculated as combination of the solutions  
74 of the basis sources. With this approach, we show that it is possible to generate  
75 simulated EMG signals from several thousands of muscle fibers within very lim-  
76 ited computation time (in the order of seconds). Moreover, each element of the  
77 model is independent so that only the model features that are changed in each  
78 simulation need to be re-computed. This characteristics allows achieving real-  
79 time simulations. The model allows breakthrough approaches in EMG inverse  
80 modelling and AI-based EMG decoding. Validation of the model by comparison

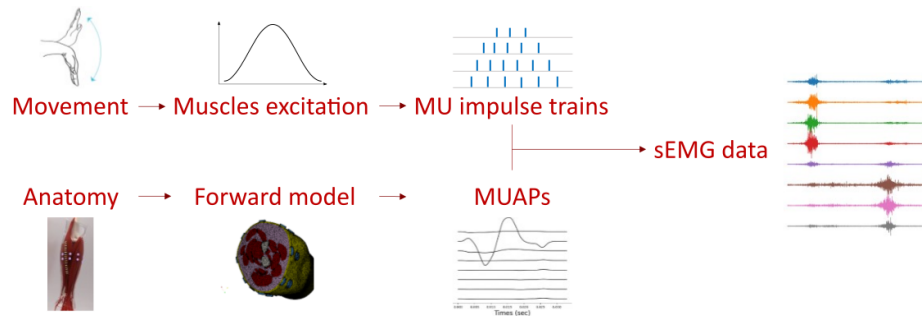

Figure 1: The general pipeline of sEMG simulation. The main steps include: 1) Motor units (MUs) recruitment model, i.e. decomposing muscle excitation into MU impulse trains; 2) Forward problem, i.e. using conductor, electrode and source models to simulate MU action potentials (MUAPs); 3) Combining MU impulse trains with corresponding MUAPs to obtain the simulated sEMG signal.

81 with analytical solutions as well as representative applications of the model are  
82 also described.

## 83 2 Methods

84 In this section we present the methods which allow the implementation of a real-  
85 istic and near real-time surface EMG (sEMG) simulator (Fig. 1). First, we cover  
86 in detail an efficient strategy to solve the EMG forward problem and discuss  
87 its implementation. Second, we present methods to generate muscle fibers and  
88 motor units (MUs) from surface meshes, MU action potentials (MUAPs) and  
89 the MU recruitment model (decomposing muscle excitation into MU impulse  
90 trains). Together, these tools allow the realistic modeling of muscle physiology  
91 and associated sEMG signals from a straightforward model description.

### 92 2.1 Forward problem

93 The fiber extracellular potentials that are measured by EMG electrodes are  
94 generated by transmembrane currents. The properties of bioelectric currents  
95 and potential fields can be determined from solutions of the Maxwell's equations,  
96 taking into account the electrical properties of biological tissues. Because of the  
97 relatively low frequencies of signal sources of biological origin, the quasi-static  
98 assumption can be applied [2, 3], so that the electric potential and the primary  
99 current sources are related by the following Poisson equation [2, 4, 5] with  
100 Neumann boundary conditions:

$$\begin{cases} \nabla \cdot (\sigma \nabla \phi) = -I & \text{in } \Omega \\ \sigma \frac{\partial \phi}{\partial \mathbf{n}} = \sigma \nabla \phi \cdot \mathbf{n} = 0 & \text{on } \partial\Omega \end{cases} \quad (1)$$

101 where  $\Omega \subset \mathbb{R}^3$  is a volume conductor domain of interest,  $\partial\Omega$  its boundary  
 102 with outward pointing normal unit vector  $\mathbf{n}$ ,  $\phi(\mathbf{r})$  [V] is the electric potential,  
 103  $I(\mathbf{r})$  [ $A/m^3$ ] is the current source density (CSD),  $\sigma(\mathbf{r})$  [ $S/m$ ] is a conductivity  
 104 tensor. The second line of the equation (boundary condition) reflects the as-  
 105 sumption that no current flows out of the domain of interest. In the context of  
 106 EMG modeling, this implies that there is no current flow between the skin and  
 107 air. The current source density  $I(\mathbf{r})$  is interpreted as the volume density of cur-  
 108 rent entering or leaving the extracellular medium at position  $\mathbf{r} \in \Omega$ . A negative  
 109 CSD corresponds to current leaving the extracellular medium (due to the fiber  
 110 transmembrane currents) and is thus conventionally called a sink. Likewise,  
 111 current entering the extracellular medium is called a source [19, 20].

112 Equation (1) cannot be solved analytically for general volume conductor  
 113 geometries, but several numerical methods can be used to approximate its so-  
 114 lution. Here, we use the finite element method (FEM) [21], which discretizes  
 115 the volume conductor  $\Omega$  as a tetrahedral mesh  $\Omega_t$ . Given this mesh, we use the  
 116 Galerkin method to project the potential  $\phi$  onto the space of piecewise affine  
 117 functions defined on  $\Omega_t$ . Fig. 2 illustrates an example of a discretized mesh  
 118 representing a realistic forearm model.

119 This discretization process converts the continuous operator problem of  
 120 Eq. (1) to a finite system of linear equations:

$$A\mathbf{v} = \mathbf{b} \quad (2)$$

121 where  $A$  is a symmetric and sparse  $n_v \times n_v$  matrix,  $n_v$  is the number of mesh  
 122 vertices,  $\mathbf{v} \in \mathbb{R}^{n_v}$  is a vector of potential values at mesh nodes, and  $\mathbf{b} \in \mathbb{R}^{n_v}$  is a  
 123 vector containing source information. Because the electric potential is defined  
 124 up to a constant, the matrix  $A$  always has a one dimensional null space. To  
 125 obtain a unique solution to the system of Eq. (2), we constrain potentials  $\mathbf{v}$  to  
 126 have a zero sum.

127 In the context of EMG, we are not interested in finding electric potentials  
 128 everywhere in the conductor, but only at the electrode locations. Let  $S$  be a  
 129 selection matrix with a shape  $n_e \times n_v$  which only selects the values at EMG  
 130 electrode locations ( $n_e$  is the number of electrodes). Each row of  $S$  can be  
 131 designed to select a single point location or to integrate over an area (e.g. the  
 132 electrode-skin interface) depending on the location and number of its non-zero  
 133 elements. Also, let  $\mathbf{b}(\mathbf{r})$  correspond to a point source at location  $\mathbf{r}$ . The resulting  
 134 EMG signal is thus given by:

$$\mathbf{v}_{point}(\mathbf{r}) = SA^{-1}\mathbf{b}(\mathbf{r}). \quad (3)$$

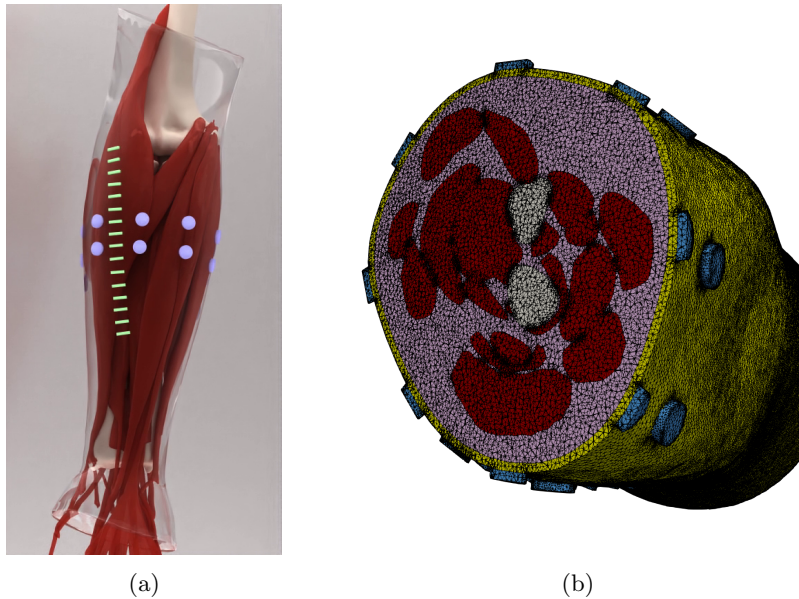

Figure 2: (a) Surface geometry of muscles, bones, subcutaneous tissue, skin and electrodes used for arm modeling (taken from BodyParts3D, The Database Center for Life Science [22]). (b) Cross section of the volume mesh  $\Omega_t$  generated from the arm surfaces.

### 135 2.1.1 Efficient implementation

136 Let us analyze in more detail the structure of  $A$  and  $\mathbf{b}$  from Eq. (2). Let  
 137  $\{w^i(\mathbf{r}), i = 1 \dots n_v\}$  be a set of  $n_v$   $P^1$  (piecewise linear) basis functions over the  
 138 tetrahedral mesh  $\Omega_t$ . Note, that  $w^i$  is 1 at the  $i$ -th vertex of the mesh, is 0 at  
 139 all other vertices and is linear at all tetrahedra adjacent to the  $i$ -th vertex. In  
 140 this case  $A$  and  $\mathbf{b}$  have the following structure:

$$A_{ij} = \int_{\Omega_t} \sigma(\mathbf{r}) \nabla w^i(\mathbf{r}) \nabla w^j(\mathbf{r}) d\mathbf{r}$$

$$b_i = \int_{\Omega_t} I(\mathbf{r}) w^i(\mathbf{r}) d\mathbf{r}.$$

141 First, let us notice that  $A$  is symmetric and, in general, a very large matrix  
 142 which can be stored only because it is sparse. Indeed, the functions  $w^i$  have a  
 143 compact support and their pairwise scalar product is non-zero only for “neighbor”  
 144 functions. Since the pseudo-inverse (or the inverse) of a sparse matrix  
 145 is usually not a sparse matrix, it is impractical to compute it because of the  
 146 amount of memory needed to store it. Thus, iterative methods are typically  
 147 used to solve the system of Eq. (2) for every given  $\mathbf{b}$ .

148 Consider the case of  $I(\mathbf{r}) = \delta(\mathbf{r} - \bar{\mathbf{r}})$  which corresponds to a unit point  
 149 current source at location  $\bar{\mathbf{r}}$ . Without loss of generality, we assume that this  
 150 source is inside a tetrahedron formed by the vertices  $i_1, \dots, i_4$  of the mesh. In  
 151 this case, we obtain:

$$b_i = \begin{cases} \lambda_j, & \text{if } i \in \{i_1, \dots, i_4\}, \\ 0, & \text{otherwise} \end{cases}$$

152 where  $\{\lambda_j, j = 1, \dots, 4\}$  are the barycentric coordinates of the point  $\bar{\mathbf{r}}$  inside the  
 153 tetrahedron  $\{i_1, \dots, i_4\}$ . Applying this expression to Eq. (3), we obtain:

$$\mathbf{v}_{point}(\bar{\mathbf{r}}) = SA^{-1}\mathbf{b}(\bar{\mathbf{r}}) = SA^{-1}\bar{B}\boldsymbol{\lambda}.$$

154 where  $\bar{B}$  is a  $n_v \times 4$  matrix with  $\bar{B}_{i_j, j} = 1$  for  $j = 1, \dots, 4$ , and 0 otherwise. This  
 155 implies that the solution of the system of Eq. (2) for any unit point source can be  
 156 computed as a barycentric sum of solutions on the vertices of the corresponding  
 157 tetrahedron. Therefore, it is sufficient to compute solutions of Eq. (2) for “basis”  
 158 sources located on mesh vertices, to be able to evaluate a solution for any point  
 159 inside this mesh in an efficient way. Let  $n_s$  be the number of such basis sources.  
 160 For the most general case, when the source can be located anywhere inside the  
 161 mesh and  $n_s = n_v$ , let  $B$  be a  $n_v \times n_s$  identity matrix. The objective is to  
 162 compute “basis” solutions:

$$V_{basis} = SA^{-1}B \quad (4)$$

163 where  $V_{basis}$  is a  $n_e \times n_s$  matrix, whose columns contain the solutions of Eq. (2)  
 164 for a unit point source located at the corresponding mesh vertex. Hence, the  
 165 potentials for any source location  $\mathbf{r}$  is given by:

$$\mathbf{v}_{point}(\mathbf{r}) = V_{basis}\boldsymbol{\lambda}(\mathbf{r}) \quad (5)$$

166 where  $\boldsymbol{\lambda}(\mathbf{r}) \in \mathbb{R}^{n_s}$  is a vector, whose four non-zero elements contain the barycen-  
 167 tric coordinates of point  $\mathbf{r}$  inside a corresponding tetrahedron. Note, that one  
 168 may restrict potential sources to be located inside specific subdomains of the  
 169 whole mesh (which is the case for EMG). In this case,  $n_s$  corresponds to the  
 170 number of vertices of these subdomains, and the matrix  $B$  is a submatrix of the  
 171 identity matrix.

172 The most straightforward way to compute  $V_{basis}$  from Eq. (4) is to solve a  
 173 problem of the form  $A\mathbf{x} = \mathbf{b}_i$  for each column of the matrix  $B$ . It would thus  
 174 require solving  $n_s$  systems of linear equations. For realistic conductor geome-  
 175 tries, which have a large number of vertices, solving a single system may take up  
 176 to a few minutes and solving  $n_s$  systems quickly becomes impractical. There-  
 177 fore, we propose the use of the adjoint method [23], which requires solving  $n_e$   
 178 systems only. In the context of EMG, the number of electrodes is usually signifi-  
 179 cantly smaller than the number of vertices in the muscle subdomain meshes, i.e.  
 180  $n_e \ll n_s$ . Let us define  $K = SA^{-1}$ , which is a matrix of size  $n_e \times n_v$ . Because  
 181  $A$  is symmetric, and the inverse of a symmetric matrix is also symmetric, we can  
 182 write  $K^T = A^{-1}S^T$ . Then,  $K$  can be found by solving the system:

$$AK^T = S^T. \quad (6)$$

183 The matrix  $S^T$  has  $n_e$  columns and, thus, only  $n_e$  linear systems need to be  
184 solved to find  $K$ . The basis solutions can then be found as:

$$V_{basis} = KB. \quad (7)$$

### 185 2.1.2 EMG signal of a single fiber activation

186 The action potential generated by the flow of ionic currents across the muscle  
187 fiber membrane is the source of excitation. For a given intracellular action  
188 potential (IAP) model  $V_m(z)$ , the transmembrane current source per unit length  
189 is proportional to the second derivative of  $V_m(z)$ . A general description of the  
190 current density source traveling at velocity  $v$  along the fiber with the origin at  
191 the neuromuscular junction at location  $z_0$  is [24, 6, 25]:

$$I(z, t) = \sigma_{in}\pi r^2 \cdot \frac{\partial}{\partial z} \left[ \psi(z - z_0 - vt)w_{L_1}(z - z_0 - \frac{L_1}{2}) - \right. \\ \left. \psi(-z + z_0 - vt)w_{L_2}(z - z_0 + \frac{L_2}{2}) \right] \quad (8)$$

192 where  $z \in [0, 1]$  is a location along the fiber,  $\psi(z) = \frac{d}{dz}V_m(-z)$ ,  $L_1$  and  $L_2$   
193 are the semi-lengths of the fiber from the end-plate to the right and to the  
194 left tendon, respectively,  $\sigma_{in}$  is the intracellular conductivity, and  $r$  is the fiber  
195 radius. We have chosen  $w_L$  to be a Tukey window, as proposed in [26]. The  
196 IAP  $V_m$  [ $\frac{mV}{mm}$ ] can be mathematically described in the space domain as proposed  
197 in [27]:

$$V_m(z) = 96z^3e^{-z} - 90.$$

198 Let  $\mathbf{r}(z)$  be a parametrized fiber geometry. Combining the transfer function of  
199 a point source in Eq. (3) with the fiber's current density in Eq. (8), we obtain  
200 the equation for the EMG signal resulting from a single fiber activation:

$$\mathbf{v}_{fiber}(t) = \int \mathbf{v}_{point}(\mathbf{r}(z))I(z, t)dz. \quad (9)$$

201 This integral can be efficiently approximated by discretizing the fiber geometry  
202 into sufficiently dense spatial samples  $\{\mathbf{r}(z_i)\}_i$  and assuming that  $\mathbf{v}_{point}(\mathbf{r}(z))$   
203 is piecewise constant around these points. If we also rewrite Eq. (8) in a shorter  
204 form as  $I(z, t) = \sigma_{in}\pi r^2 \cdot \frac{\partial}{\partial z}F(z, t)$ , Eq. (9) becomes:



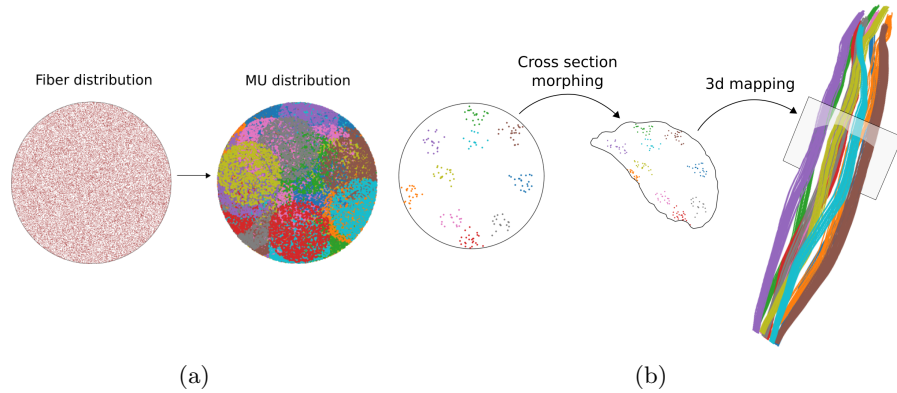

Figure 3: Fiber and motor unit distributions. (a) Uniformly distributed fibers inside a unit circle are grouped into motor units of different sizes, locations and territories. (b) Example of mapping of 10 small motor units from the circle into an arbitrary muscle by morphing the unit circle into the muscle cross section.

$$\begin{aligned}
 \mathbf{v}_{fiber}(t) &\approx \sum_i \mathbf{v}_{point}(\mathbf{r}(z_i)) \int_{z_i-\Delta_i}^{z_i+\Delta_i} I(z,t) dz = \\
 &\sum_i \mathbf{v}_{point}(\mathbf{r}(z_i)) \int_{z_i-\Delta_i}^{z_i+\Delta_i} \sigma_{in} \pi r^2 \cdot \frac{\partial}{\partial z} F(z,t) dz = \\
 &\sigma_{in} \pi r^2 \sum_i \mathbf{v}_{point}(\mathbf{r}(z_i)) \left( F(z_i + \Delta_i, t) - F(z_i - \Delta_i, t) \right). \quad (10)
 \end{aligned}$$

205 Note, that  $\mathbf{v}_{point}(\mathbf{r}(z_i))$  can be efficiently computed from Eq. (5). Moreover,  
 206 once  $\mathbf{v}_{point}(\mathbf{r}(z_i))$  are computed for all given fibers, we can change the param-  
 207 eters of the current source density (action potential waveform shape, propagation  
 208 velocity, location of neuromuscular junction), and compute the corresponding  
 209 EMG signal with Eq. (10) by only matrix multiplication complexity.

## 210 2.2 Geometrical and physiological modeling of motor units

211 The motor unit action potential (MUAP) is the summation of the single fiber  
 212 action potentials (APs) of the muscle fibers in the MU. Different types of MUs  
 213 can be modeled [28, 29]. Our approach consists in generating fiber and motor  
 214 unit distributions inside a unit circle, and then projecting it into arbitrary 3D  
 215 muscle geometry (Fig. 3b), using methods similar to those described in [30].  
 216 This provides a high level of control for the fiber and MU distribution param-  
 217 eters independently of a particular muscle geometry. A common way to simulate  
 218 fibers and MUs is to start by defining MU positions, sizes and territories, and  
 219 then simulate fibers inside these MUs according to their parameters [31, 32]. We,



220 however, propose another approach. First, we simulate uniformly distributed  
221 fibers inside a unit circle. Then, MU centers and their circular territories are  
222 generated and, finally, we associate each fiber to an MU. A fiber is associated  
223 to one of the MUs that contains it inside its territory with a probability propor-  
224 tional to the MU density (Fig. 3a). This approach has two main advantages.  
225 First, it guaranties (by construction) the uniform fiber distribution inside a cir-  
226 cular muscle cross-section. Second, once fibers are generated and projected into  
227 a muscle geometry, different MU distributions can be generated very quickly,  
228 without regenerating fibers and recomputing transfer functions  $\mathbf{v}_{point}(\mathbf{r}(z_i))$  for  
229 their nodes.

### 230 MU recruitment model

231 During muscle contraction, the MUs are recruited according to the size princi-  
232 ple [33]. This can be simulated by associating a threshold of excitation to each  
233 MU, as described for example by Fuglevand et al. [34]. Linear or non-linear  
234 rate coding models can be used [34, 35, 36].

235 The excitation rate as a function of time for each muscle is converted into  
236 the firing rates of the active MUs. Inter-discharge intervals are then generated  
237 with variability of the discharges around the mean firing interval [37].

## 238 3 Results

239 The implementation of the main steps presented in the previous section can  
240 be summarized as follows. Once the matrices  $S$ ,  $A$  and  $B$  are computed, the  
241 matrix  $K$  is determined using Eq. (6) by solving  $n_e$  linear systems. Then,  
242 Eq. (7) is used to find the solutions for  $n_s$  basis points, which is a fast matrix  
243 multiplication operation. For any given point source location  $\mathbf{r}$ , we compute  
244 its barycentric coordinates in associated tetrahedron and apply Eq. (5) to get  
245 values of electrical potentials at electrode locations. Finally, for a given fiber  
246 geometry, the single fiber action potential as recorded by the EMG electrodes  
247 is computed using Eq. (9).

248 The results presented in this study are obtained using a Python implementa-  
249 tion of the proposed strategy. Assembling the matrix  $A$  and solving the system  
250 (6) is delegated to the FEniCS computing platform [38, 39]. The forearm ge-  
251 ometry that is here representatively used as a conductor model is taken from  
252 the website of BodyParts3D, The Database Center for Life Science [22]. The  
253 volume mesh is generated from the surface meshes of the forearm tissues using  
254 the CGAL C++ library [40].

### 255 3.1 Comparison with an analytical solution

256 First, we validated our numerical solution by comparing it with an analytical  
257 one (using the model presented in [7]) for a simple volume conductor geometry.  
258 We used a four layer cylindrical model with layers corresponding to bone ( $r =$

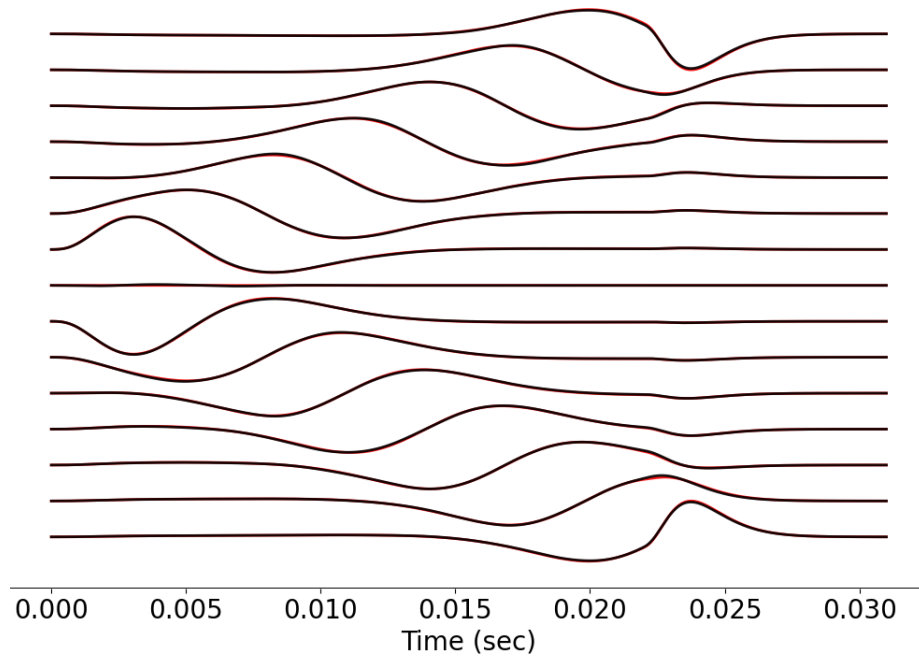

Figure 4: Comparison of the numerical and analytical [7] solutions for a four layer cylindrical volume conductor model: analytical (red) and numerical (black) sEMG signals for the differential electrode montage. The depth of the source fiber is 1mm from the muscle surface.

259 0.7cm), muscle ( $r = 2\text{cm}$ ), fat ( $r = 2.3\text{cm}$ ) and skin ( $r = 2.4\text{cm}$ ) surfaces. 16  
260 point electrodes were simulated right on top of a fiber. The fiber was located at  
261 varying depths into the muscle tissue, in the range 1 mm to 11 mm. Differential  
262 sEMG signal was simulated using analytical and numerical solutions of the  
263 forward problem. The normalized mean square error between the two solutions  
264 depended on the depth of the fiber and varied between 3% (1mm depth from  
265 the muscle surface) and 5% (11mm depth).

266 Let us notice that the two volume conductor models in this validation are  
267 not exactly the same. The theoretical solution is computed for an infinitely long  
268 cylinder (repeated periodically when discretized), while the numerical solution  
269 uses a cylinder of a large (sufficiently longer than the fiber and the electrode  
270 array) yet finite length. Increasing the length of the cylinder did not significantly  
271 alter the error.

272 Fig. 4 shows the analytical (red) and numerical (black) solutions for the fiber  
273 depth of 1 mm from the muscle surface. Because of the low error value, the two  
274 waveforms are almost indistinguishable.

| General basis points   | Fibers basis points | Fibers EMG response | MUs EMG response | Raw sEMG assembling |
|------------------------|---------------------|---------------------|------------------|---------------------|
| 7 min<br>(13 sec/elec) | 2 min               | 30 sec              | 0.8 sec          | 2.6 sec             |

Table 1: Computational performance of each of the main steps of a raw EMG simulation. General basis points computation refers to equation (7); fiber basis points are computed with equation (5); fibers EMG response is computed with equation (9).

### 275 3.2 Computational performance

276 In this section we report the computational time of the proposed model for a  
277 specific simulation case. Note, that no multiprocessing tools were used in these  
278 computations. Each step, however, is highly scalable and can be efficiently  
279 distributed between parallel processes, which would significantly increase the  
280 performance. Computations for each muscle and fiber are independent and can  
281 be performed in parallel. Parallel computing would also apply to the electrodes  
282 in the general basis points computation.

283 For the purpose of demonstration, we simulated a 1-min long, 100% maxi-  
284 mum voluntary contraction (MVC) excitation of the Brachioradialis muscle with  
285 50000 individual fibers and 200 motor units. The mesh of the volume conductor  
286 contained 2.1M vertices which formed 13M tetrahedra. 16 rectangular and 16  
287 circular electrodes were included in the model. The sampling frequency of the  
288 simulated signals was 2000 Hz. Table 1 shows the computational time for each  
289 of the main steps in this simulation.

290 Note that a list of parameters need to be provided for each step of Table 1.  
291 However, an important property of our model is that each step depends only  
292 on the data produced by the previous steps. This property can be exploited  
293 to change some simulation parameters without recomputing every step of the  
294 simulation. For example, it is not necessary to recompute solutions for the fiber  
295 basis points if only the simulation parameters related to the MU distribution or  
296 recruitment model are modified. In this example, the **total** simulation time for  
297 this new set of parameters will only take approximately  $0.8 + 2.6 = 3.4$  s.

298 A brief description of the main parameters required at each step follows.  
299 The full arm and electrode geometry as well as the tissue conductivities define  
300 the computation general basis points. To compute fibers basis points solutions,  
301 the 3D geometry of the fibers is required. Computing the fiber EMG responses  
302 requires the shape of the intracellular AP waveforms, AP propagation velocity,  
303 sizes of tendon and active fiber parts, neuromuscular junction location, fiber di-  
304 ameter and intracellular conductivity, and sampling frequency. To compute the  
305 MUs action potentials, the MU distribution in the muscle, i.e. the association of  
306 fibers to each motor unit, need to be defined. In the proposed model, once the  
307 number of MUs, their sizes and territory areas are selected, the MU distribu-

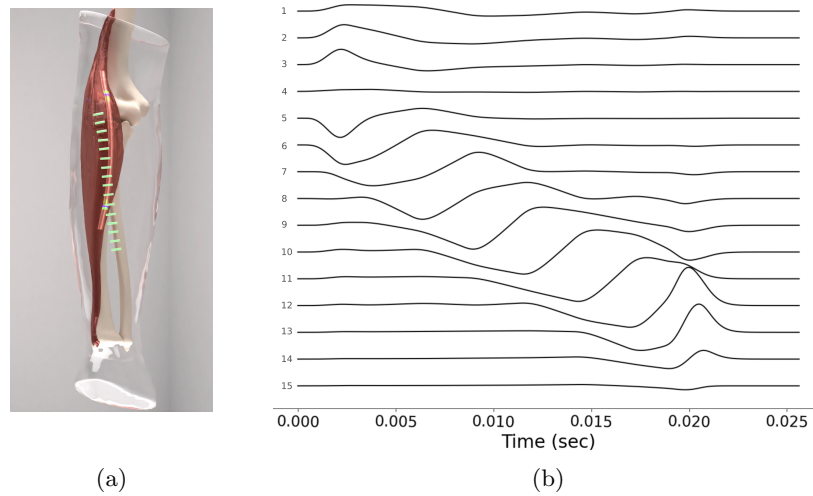

Figure 5: Single fiber activation in the Brachioradialis muscle: (a) Fiber and electrodes geometry. (b) Differential sEMG signal of a single fiber activation.

308 tion is randomly generated. Finally, to synthesize the sEMG signal, the muscle  
309 excitation drives and recruitment model parameters (motor unit recruitment  
310 thresholds and firing rates) are required.

### 311 3.3 Simulation examples

#### 312 Single fiber activation

313 We begin by simulating the EMG signal associated to a single fiber activation  
314 inside the Brachioradialis muscle. The signal for an array of 16 rectangular  
315 electrodes and 8 kHz time resolution was generated. Fig. 5 illustrates the geo-  
316 metrical location of the fiber and the corresponding sEMG signal in differential  
317 electrode montage. Different distinctive features are present in the simulated  
318 signal that are also observed in experimental sEMG signals [41]. In particular,  
319 electrodes of the channel 4 are located on different sides of the neuromuscular  
320 junction (NMJ) and thus cancel each other out. Channels 7-11 contain prop-  
321 agating sEMG components resulted from the fiber AP propagating from the  
322 NMJ to the tendons. Channels 2-6, as well as channels 12-15, contain non-  
323 propagating sEMG components, which are due to the AP generation at the  
324 NMJ and its extinction at the tendon (end-of-fiber effect), respectively.

#### 325 Single muscle activation

326 The next example is a simulation of an excitation of a single muscle (Fig. 6). A  
327 simple excitation drive for the Brachioradialis muscle was simulated. It gradu-  
328 ally goes from 0% to 100% maximum voluntary contraction and back to 0. 50k  
329 muscle fibers were generated inside the muscle and distributed within 200 motor

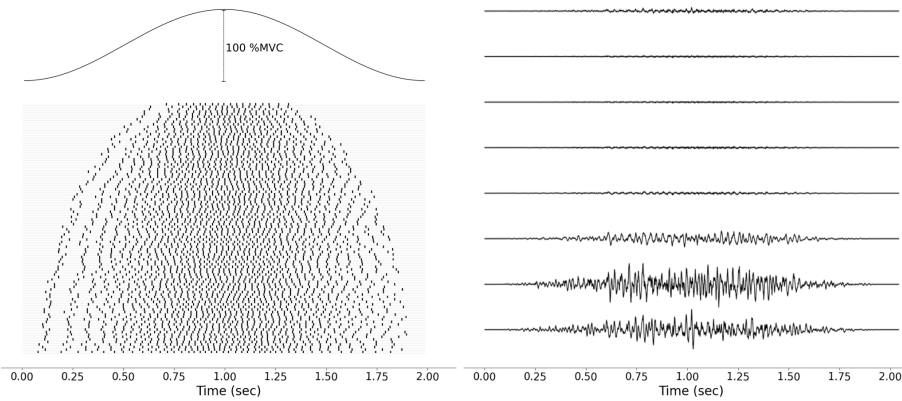

Figure 6: Activation of the Brachioradialis muscle. Muscle excitation is first decomposed into motor unit impulse trains (on the left). Then, the sEMG signal recorded by 8 bipolar electrodes (see Fig. 2a) was simulated (on the right).

330 units. The size of MUs varied exponentially from 11 to 1150 fibers. The areas  
331 of MU territories varied from 10% to 50% of the muscle cross-sectional area.  
332 The muscle excitation drive was decomposed into MU impulse trains according  
333 to the size principle. In this example, the firing rate for each MU ranged from 8  
334 Hz to 35 Hz and all MUs were recruited when an excitation level of 75% MVC  
335 was reached.

### 336 **Multiple muscle coordination**

337 Finally, we simulated sEMG signals from multiple muscle excitations corre-  
338 sponding to wrist flexion and extension (Fig. 8). Two groups of muscles were  
339 involved. The flexor group included the Palmaris longus, Flexor carpi ulnaris  
340 (ulnar head), Flexor carpi ulnaris (humeral head), and Flexor carpi radialis  
341 muscles. The extensor group included the Extensor digitorum, Extensor carpi  
342 ulnaris, Extensor carpi radialis brevis, and Extensor carpi radialis longus mus-  
343 cles. During a wrist flexion, the muscles of the flexor group reached an excitation  
344 level of 70-90% MVC, while the extensor muscles acted as antagonists with exci-  
345 tation in the range 10-30% MVC. During extension, the agonist-antagonist roles  
346 switched. Moreover, a small but constant excitation of the abduction muscle  
347 group was added to simulate the wrist resistance against gravity. The abduc-  
348 tion muscle group included the Flexor carpi radialis, Extensor carpi radialis  
349 brevis, and Extensor carpi radialis longus muscles. For each muscle, a number  
350 of muscle fibers between 32k and 78k was simulated, depending on the muscle  
351 cross sectional area. Muscle fibers were distributed within motor units, whose  
352 number varied from 150 to 300 per muscle.

353 Fig. 8 clearly shows the similarities in signal characteristics between experi-  
354 mental and simulated data. Beside the different activation across the electrodes  
355 during flexion and extension, the effect of wrist abduction is also visible in both

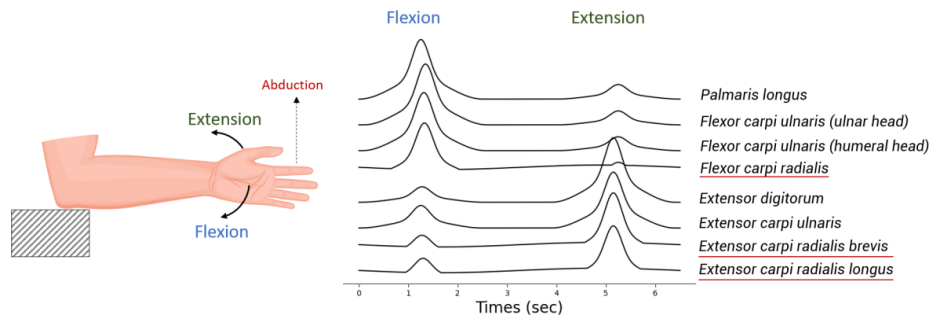

Figure 7: Muscle excitation model for wrist flexion/extension. During a wrist flexion, the muscles of the flexor group reached an excitation level of 70-90% MVC, while the extensor muscles acted as antagonists with excitation in the range 10-30% MVC. During extension the roles were switched. A constant wrist abduction was also added to simulate wrist resistance against gravity to keep it in the horizontal position.

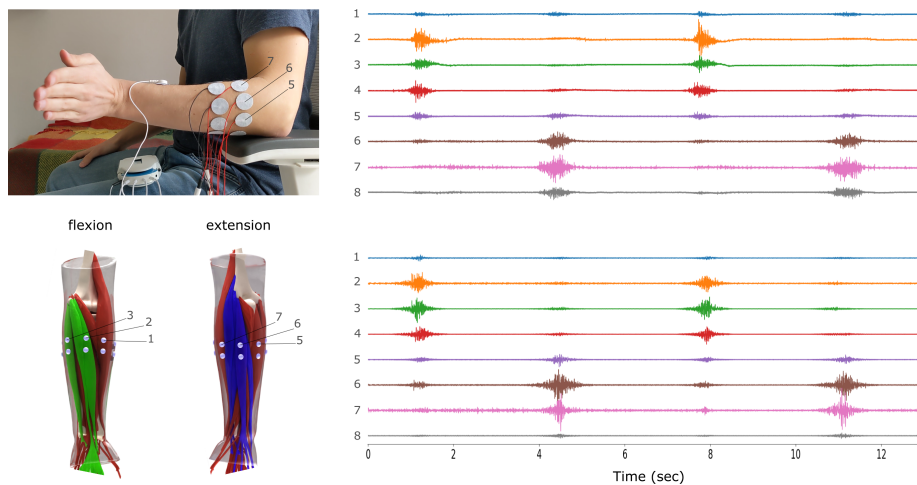

Figure 8: Comparison of experimental (top) and simulated (bottom) sEMG signals for the left wrist flexion and extension. The experimental signals were measured with 8 bipolar electrodes located around the forearm. For simulation, the flexor (green) and extensor (blue) muscle groups were activated in turn with activation peaks aligned with the experimental signal peaks.

356 data sets. Thus, channel 7 presents signal activity during the whole duration of  
 357 the simulation, with peak of the signal during extension.

358 However, as the model used for this simulation is not personalized, simulated  
 359 signals do not perfectly replicate all the details of the experimental signals. For  
 360 example, channel 8 for the experimental measurements has remarkably higher  
 361 amplitude during extension than in the simulated conditions.

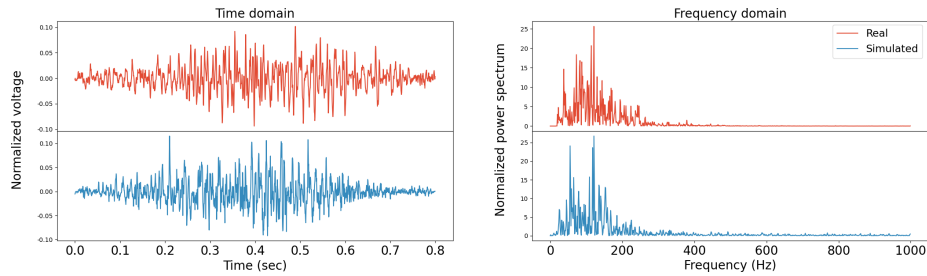

Figure 9: Comparison of experimental (red) and simulated (blue) single channel normalized sEMG signals in the time and frequency domains.

362 In addition to the analysis in time domain, simulated data were compared  
363 against the experimental data in the frequency domain. Fig. 9 shows an example  
364 of the measured and simulated single channel sEMG. The two signals have  
365 similar power spectra. It has to be noted that the spectral characteristics of  
366 a signal strongly depends on multiple simulation parameters. In this example,  
367 we run several hundreds simulations by varying the simulation parameters in a  
368 realistic range and selected the set of parameters leading to the minimal spectral  
369 difference. This approach, which is a simple version of inverse modelling, was  
370 possible because of the extremely high computational speed of the simulations.

## 371 4 Discussion

372 We have proposed an efficient computational approach to solve the volume con-  
373 ductor problem in the generation of surface EMG signals. The method provides  
374 the solution to the generation of EMG signals from realistic volume conduc-  
375 tor properties and number of muscle fibers, within limited computational time.  
376 Moreover, once the model is solved for a specific volume conductor, the pro-  
377 posed approach provides solutions for an arbitrary number and properties of  
378 fibers and motor units, activations of the motor units as well as signal du-  
379 ration and sampling frequency, without re-computing the volume conductor  
380 solution. This property allows us to generate EMG signals within a computa-  
381 tional time compatible with real-time signal generation (see example videos on  
382 <https://www.youtube.com/channel/UCuLDYbGBvSkJzaPlFgzKQ2Q>). The pro-  
383 posed model is the only available EMG simulator with realistic description of  
384 the volume conductor and optimized for such computational efficiency. The  
385 modelling of EMG signals is based on the description of the electrical activity  
386 of the fiber membrane, in terms of intracellular and transmembrane electrical  
387 potentials. The electric field generated by the fiber electrical activity is recorded  
388 in a volume conductor, which is often described under the electrostatic assump-  
389 tion. Various mathematical descriptions of the intracellular action potential  
390 and volume conductor have been previously provided [27, 25, 42]. The compu-  
391 tational efficiency in the volume conductor solution has been recognized as an



392 important component of EMG modelling and some attempts to decrease the  
393 computational time in EMG simulations have been described. For example,  
394 Dimitrov & Dimitrova [43] substantially decreased the computational time in  
395 EMG modeling by computing the impulse response of the volume conductor, so  
396 that the surface action potentials generated by muscle fibers were determined  
397 as a convolution between the first derivative of the intracellular action potential  
398 and the impulse response. This approach, based on the classic description of  
399 a single fiber electrical activity by Lorente de Nó [44], allowed to compute one  
400 single convolution to generate extracellular potentials generated by an arbitrary  
401 analytical description of the intracellular action potential, with generation at the  
402 end plate, propagation along the fiber, and extinction at the tendons. However,  
403 the volume conductor in the model proposed by Dimitrov & Dimitrova [43] was  
404 an infinite homogeneous medium, which limited the accuracy of the simulations  
405 with respect to realistic conditions.

406 The mathematical description of the full generation and extinction process  
407 of the intracellular action potential by the first temporal derivative, as pro-  
408 posed by Dimitrov & Dimitrova [43], provided an analytical method to describe  
409 the source of EMG signal with one single spatio-temporal function. In princi-  
410 ple, this description can be used with complex volume conductors as long as a  
411 transfer function can be computed. Farina et al. proposed a spatial frequency  
412 domain description of non-homogeneous planar [6] and cylindrical [7] volume  
413 conductors, so that the effect of the volume conductor could be described by  
414 a temporal convolution with the first derivative of the intracellular action po-  
415 tential, as previously done with simpler geometries by Dimitrov & Dimitrova  
416 [43]. The same approach could be applied to numerical descriptions of the vol-  
417 ume conductor when the property of spatial invariance along the direction of  
418 propagation of the muscle fibers was satisfied [5]. These solutions therefore  
419 were restricted to cylindrical volume conductors, i.e. volume conductor with  
420 invariant cross-section along the fiber direction.

421 Realistic models using numerical solutions have also been recently proposed.  
422 The previous most complete and efficient model has been proposed by Pereira  
423 Botelho et al. [15]. These authors have used an anatomically accurate model  
424 to simulate EMG signals generated during index finger flexion and abduction.  
425 They gained computational speed by using the principle of reciprocity. In fact,  
426 one part of our calculations also includes the adjoint method which is an alge-  
427 braic representation of this principle. By reciprocity, Pereira Botelho et al. [15]  
428 reported a computational time of 1 hour for simulating the activation of nearly  
429 15500 fibers for 5 electrodes. This time remains impractical for simulating arbi-  
430 trary large data sets for a variety of parameter values. The model we proposed  
431 in this paper substantially surpasses the computational efficiency reported in  
432 [15] (see our Table 1, as an example). To achieve this extreme reduction in  
433 computational time without any constraints on the volume conductor, we have  
434 optimized the numerical computation by reducing the main calculations to the  
435 solutions corresponding to basis points, from which a general solution can be  
436 obtained. The approach does not only reduce the computational time for a full  
437 simulation but also allows us to scale the solution, so that new solutions for

438 the same volume conductor can be obtained without re-computing the volume  
439 conductor transformation. In this way, the generation of EMG signals within  
440 the same volume conductor, but varying all other simulation parameters, can  
441 be performed extremely fast. Complex EMG signals from tens of thousands  
442 of muscle fibers located in multiple muscles, can therefore be generated (and  
443 regenerated with different parameter values) in a computational time of the  
444 order of seconds. The described model is the first that allows an extremely  
445 accurate signal generation within a limited computational time. Contrary to  
446 previous models, the proposed simulator does not compromise accuracy and  
447 computational speed.

448 In perspective, to make simulated sEMG signals even more realistic, the cur-  
449 rent model can be extended by including advanced noise and artifacts modeling,  
450 biomechanical modeling of the musculoskeletal system and dynamic volume con-  
451 ductor and fiber geometry. While these aspects are beyond the scope of this  
452 paper, they are relevant features to include in future developments.

453 One of the reasons for developing a model with high accuracy and speed, is  
454 its potential for addressing the inverse problem, i.e. to identify the location of  
455 active motor units or muscle compartments within the volume conductor given  
456 the recorded EMG signals at the skin surface. The identification of model pa-  
457 rameters in inverse modelling requires the fast computation of a large number  
458 of solutions for the identification of a globally optimal solution. Current at-  
459 tempts to EMG inverse modelling are based on simplified volume conductors,  
460 as well as simplified assumptions in terms of motor unit activation, in order to  
461 identify the inverse solution in a realistic time [45]. The model proposed in this  
462 work removes all the simplifications to realistic simulations, maintaining high  
463 computational speed. Another application of precise and fast EMG simulations  
464 is data augmentation in AI-based signal classification and/or decomposition.  
465 The proposed model can indeed be used for generating a large variability of  
466 data from multiple volume conductor and fiber properties in order to generalize  
467 processing methods across experimental sessions and individuals.

468 In conclusion, we have proposed a fast and highly accurate approach to sim-  
469 ulate surface EMG signals. The computational efficiency of our model greatly  
470 surpasses any other currently available solution. The modelling approach is  
471 based on an efficient determination of the EMG solution by a modular approach  
472 for which processing steps do not need to be repeated if some of the simulation  
473 conditions remain constant. The model has the potential of substantially ex-  
474 panding the applications of EMG modelling, especially in relation to modern  
475 AI-based approaches of inverse modelling and signal decomposition.

## 476 **Acknowledgments**

477 DF is funded by the European Research Council (project NaturalBionicS) and  
478 the EPSRC (project NISNEM).

## 479 Competing interests

480 KM and SDG are founders of Neurodec company.

## 481 References

- 482 [1] Dick F. Stegeman, Joleen H. Blok, Hermie J. Hermens, and Karin  
483 Roeleveld. Surface emg models: Properties and applications, 2000.
- 484 [2] Robert Plonsey. Action potential sources and their volume conductor fields.  
485 *Proceedings of the IEEE*, 65:601–611, 1977.
- 486 [3] Robert Plonsey and Dennis B. Heppner. Considerations of quasi-  
487 stationarity in electrophysiological systems. *The Bulletin of mathematical*  
488 *biophysics*, 29(4):657–664, December 1967.
- 489 [4] Anco Heringa, Dick F. Stegeman, Gèrard J.H. Uijen, and Johannes P.C. De  
490 Weerd. Solution methods of electrical field problems in physiology. *IEEE*  
491 *Transactions on Biomedical Engineering*, BME-29, 1982.
- 492 [5] Dario Farina, Luka Mesin, and Simone Martina. Advances in surface elec-  
493 tromyographic signal simulation with analytical and numerical descriptions  
494 of the volume conductor. *Medical and Biological Engineering and Comput-*  
495 *ing*, 42, 2004.
- 496 [6] Dario Farina and Roberto Merletti. A novel approach for precise simulation  
497 of the emg signal detected by surface electrodes. *IEEE Transactions on*  
498 *Biomedical Engineering*, 48, 2001.
- 499 [7] Dario Farina, Luca Mesin, Simone Martina, and Roberto Merletti. A sur-  
500 face emg generation model with multilayer cylindrical description of the vol-  
501 ume conductor. *IEEE Transactions on Biomedical Engineering*, 51, 2004.
- 502 [8] Joleen H. Blok, Dick F. Stegeman, and Adriaan Van Oosterom. Three-layer  
503 volume conductor model and software package for applications in surface  
504 electromyography. *Annals of Biomedical Engineering*, 30, 2002.
- 505 [9] Theis H. J. M. Gootzen, Dick F. Stegeman, and Adriaan van Oosterom.  
506 Finite limb dimensions and finite muscle length in a model for the gen-  
507 eration of electromyographic signals. *Electroencephalography and Clinical*  
508 *Neurophysiology/ Evoked Potentials*, 81, 1991.
- 509 [10] Andrew J. Fuglevand, David A. Winter, Aftab E. Patla, and Daniel  
510 Stashuk. Detection of motor unit action potentials with surface electrodes:  
511 influence of electrode size and spacing. *Biological Cybernetics*, 67, 1992.
- 512 [11] Dick F. Stegeman and Wim H.J.P. Linssen. Muscle fiber action potential  
513 changes and surface emg: A simulation study. *Journal of Electromyography*  
514 *and Kinesiology*, 2, 1992.

- 515 [12] Guang Yue, Andrew J. Fuglevand, Michael A. Nordstrom, and Roger M.  
516 Enoka. Limitations of the surface electromyography technique for estimat-  
517 ing motor unit synchronization. *Biological Cybernetics*, 73, 1995.
- 518 [13] Karin Roeleveld, Joleen H. Blok, Dick F. Stegeman, and Adriaan Van  
519 Oosterom. Volume conduction models for surface emg; confrontation with  
520 measurements. volume 7, 1997.
- 521 [14] Jochen Schneider, Jiri Silny, and Günter Rau. Influence of tissue in-  
522 homogeneities on noninvasive muscle fiber conduction velocity measure-  
523 ments—investigated by physical and numerical modeling. *IEEE Transac-  
524 tions on Biomedical Engineering*, 38, 1991.
- 525 [15] Diego Pereira Botelho, Kathleen Curran, and Madeleine M. Lowery.  
526 Anatomically accurate model of emg during index finger flexion and abduc-  
527 tion derived from diffusion tensor imaging. *PLoS Computational Biology*,  
528 15, 2019.
- 529 [16] Alexander Kenneth Clarke, Seyed Farokh Atashzar, Alessandro Del Vec-  
530 chio, Deren Barsakcioglu, Silvia Muceli, Paul Bentley, Filip Urh, Ales  
531 Holobar, and Dario Farina. Deep learning for robust decomposition of  
532 high-density surface emg signals. *IEEE Transactions on Biomedical Engi-  
533 neering*, 68, 2021.
- 534 [17] Ales Holobar and Dario Farina. Non-invasive neural interfacing with wear-  
535 able muscle sensors. *IEEE Signal Processing Magazine*, in-press 2021.
- 536 [18] Luca Mesin. Inverse modelling to reduce crosstalk in high density surface  
537 electromyogram. *Medical Engineering and Physics*, 85, 2020.
- 538 [19] Charles Nicholson and John A. Freeman. Theory of current source density  
539 analysis and determination of conductivity tensor for anuran cerebellum.  
540 *Journal of Neurophysiology*, 38, 1975.
- 541 [20] Klas H. Pettersen, Henrik Lindén, Anders M. Dale, and Gaute T. Einevoll.  
542 *Extracellular spikes and current-source density*, pages 92–135. Cambridge  
543 University Press, Cambridge, UK, 2010.
- 544 [21] Lutz Angermann Peter Knabner. *The Finite Element Method for the Pois-  
545 son Equation*, pages 46–91. Springer New York, New York, NY, 2003.
- 546 [22] MS Windows NT kernel description.
- 547 [23] Sylvain Vallaghé, Théodore Papadopoulo, and Maureen Clerc. The adjoint  
548 method for general eeg and meg sensor-based lead field equations. *Physics  
549 in Medicine and Biology*, 54, 2009.
- 550 [24] Roberto Merletti and Dario Farina. *Surface Electromyography: Physiology,  
551 Engineering and Applications*. 2016.

- 552 [25] Robert Plonsey. The active fiber in a volume conductor. *IEEE Transactions*  
553 *on Biomedical Engineering*, BME-21, 1974.
- 554 [26] Vincent Carriou, Sofiane Boudaoud, Jeremy Laforet, and Fouaz Sofiane  
555 Ayachi. Fast generation model of high density surface emg signals in a  
556 cylindrical conductor volume. *Computers in Biology and Medicine*, 74,  
557 2016.
- 558 [27] Poul Rosenfalck. Intra- and extracellular potential fields of active nerve and  
559 muscle fibres. a physico-mathematical analysis of different models. *Acta*  
560 *physiologica Scandinavica. Supplementum*, 321:1—168, 1969.
- 561 [28] R. E. Burke, D. N. Levine, P. Tsairis, and F. E. Zajac. Physiological types  
562 and histochemical profiles in motor units of the cat gastrocnemius. *The*  
563 *Journal of Physiology*, 234, 1973.
- 564 [29] Stefano Schiaffino and Carlo Reggiani. Fiber types in mammalian skeletal  
565 muscles. *Physiological Reviews*, 91, 2011.
- 566 [30] Luca Modenese and Josef Kohout. Automated generation of three-  
567 dimensional complex muscle geometries for use in personalised muscu-  
568 loskeletal models. *Annals of Biomedical Engineering*, 48, 2020.
- 569 [31] Kevin G. Keenan, Dario Farina, Roberto Merletti, and Roger M. Enoka. In-  
570 fluence of motor unit properties on the size of the simulated evoked surface  
571 emg potential. *Experimental Brain Research*, 169, 2006.
- 572 [32] Vincent Carriou, Jeremy Laforet, Sofiane Boudaoud, and Mariam Al Har-  
573 rach. Realistic motor unit placement in a cylindrical hd-semg generation  
574 model. volume 2016-October, 2016.
- 575 [33] Elwood Henneman. Relation between size of neurons and their susceptibil-  
576 ity to discharge. *Science*, 126, 1957.
- 577 [34] Andrew Fuglevand, David A. Winter, and Aftab E. Patla. Models of re-  
578 cruitment and rate coding organization in motor-unit pools. *Journal of*  
579 *Neurophysiology*, 70, 1993.
- 580 [35] Fouaz Sofiane Ayachi, Sofiane Boudaoud, and Catherine K Marque. Eval-  
581 uation of muscle force classification using shape analysis of the semg prob-  
582 ability density function: A simulation study. *Medical and Biological Engi-*  
583 *neering and Computing*, 52, 2014.
- 584 [36] Carlo J. De Luca and Emily C. Hostage. Relationship between firing rate  
585 and recruitment threshold of motoneurons in voluntary isometric contrac-  
586 tions. *Journal of Neurophysiology*, 104, 2010.
- 587 [37] Todor I. Arabadzhiev, Vladimir G. Dimitrov, Nonna A. Dimitrova, and  
588 George V. Dimitrov. Influence of motor unit synchronization on ampli-  
589 tude characteristics of surface and intramuscularly recorded emg signals.  
590 *European Journal of Applied Physiology*, 108, 2010.

- 591 [38] Anders Logg, Kent Andre Mardal, and Garth N. Wells. Automated solution  
592 of differential equations by the finite element method. *Lecture Notes in*  
593 *Computational Science and Engineering*, 84 LNCSE, 2012.
- 594 [39] The fenics project version 1.5. *The FEniCS Project Version 1.5*, 3, 2015.
- 595 [40] The CGAL Project. *CGAL User and Reference Manual*. CGAL Editorial  
596 Board, 5.2.1 edition, 2021.
- 597 [41] R. Merletti and S. Muceli. Tutorial. surface emg detection in space and  
598 time: Best practices. *Journal of Electromyography and Kinesiology*, 49,  
599 2019.
- 600 [42] Willemien Wallinga, S. L. Meijer, M. J. Alberink, M. Vlieg, E. D. Wienk,  
601 and D. L. Ypey. Modelling action potentials and membrane currents of  
602 mammalian skeletal muscle fibres in coherence with potassium concentra-  
603 tion changes in the t- tubular system. *European Biophysics Journal*, 28,  
604 1999.
- 605 [43] George V. Dimitrov and Nonna A. Dimitrova. Precise and fast calculation  
606 of the motor unit potentials detected by a point and rectangular plate  
607 electrode. *Medical Engineering and Physics*, 20, 1998.
- 608 [44] Rafael Lorente de Nó. A study of nerve physiology. *Studies from the*  
609 *Rockefeller institute for medical research. Reprints. Rockefeller Institute*  
610 *for Medical Research*, 131, 1947.
- 611 [45] Yasuhiro Nakajima, Saran Keeratihattayakorn, Satoshi Yoshinari, and  
612 Shigeru Tadano. An emg-ct method using multiple surface electrodes in  
613 the forearm. *Journal of Electromyography and Kinesiology*, 24, 2014.
